# Supplementary material for: A 23 gene–based molecular prognostic score precisely predicts overall survival of breast cancer patients
Source: PubMed Central journal article supplement — eBioMedicine. 2019 Jul 26;46:150–9. doi: 10.1016/j.ebiom.2019.07.046 (PMC6711850; doi:10.1016/j.ebiom.2019.07.046), 2019-07-26
Supplement: mmc5.pdf [file mmc5.pdf]

1 **Supplementary data**

2

3 **A 23 gene–based molecular prognostic score**  
4 **precisely predicts overall survival of breast cancer**  
5 **patients**

6

7 Hideyuki Shimizu, Keiichi I. Nakayama

8

9 **Tables:**

10 **Table S1.** List of international cohorts integrated in meta-analysis.

11 **Table S2.** Prognosis-related genes of the TCGA discovery cohort.

12 **Table S3.** Prognosis-related genes identified by meta-analysis.

13 **Table S4.** Characteristics of mPS in the METABRIC training cohort.

14

15 **Supplementary figures:**

16 **Fig. S1.** Workflow for computational calculations.

17 **Fig. S2.** Comprehensive validation of all prognosis-related genes by meta-analysis.

18 **Fig. S3.** Representative calculation of mPS.

19 **Fig. S4.** Characteristics of mPS bins.

20 **Fig. S5.** mPS stratifies DFS.

21 **Fig. S6.** Stratification of patients according to mPS for intrinsic subtypes of breast  
22 cancer.

23 **Fig. S7.** Kaplan-Meier curves according to mPS for OS of patients in the  
24 METABRIC test cohort in their 50s or 60s.

25 **Fig. S8.** Kaplan-Meier curves according to mPS for OS of patients in the  
26 METABRIC test cohort with IDC or MDLC.

27 **Fig. S9.** Stratification of breast cancer patients of different races according to mPS.

28 **Fig. S10.** Kaplan-Meier curves according to mPS for OS of patients in the  
29 METABRIC test cohort at clinical TNM stage I or III.

30 **Fig. S11.** Stratification of patients according to mPS regardless of NPI.

31 **Fig. S12.** Relation of chemotherapy to OS in the METABRIC cohort.

32

Shimizu et al. Figure S1

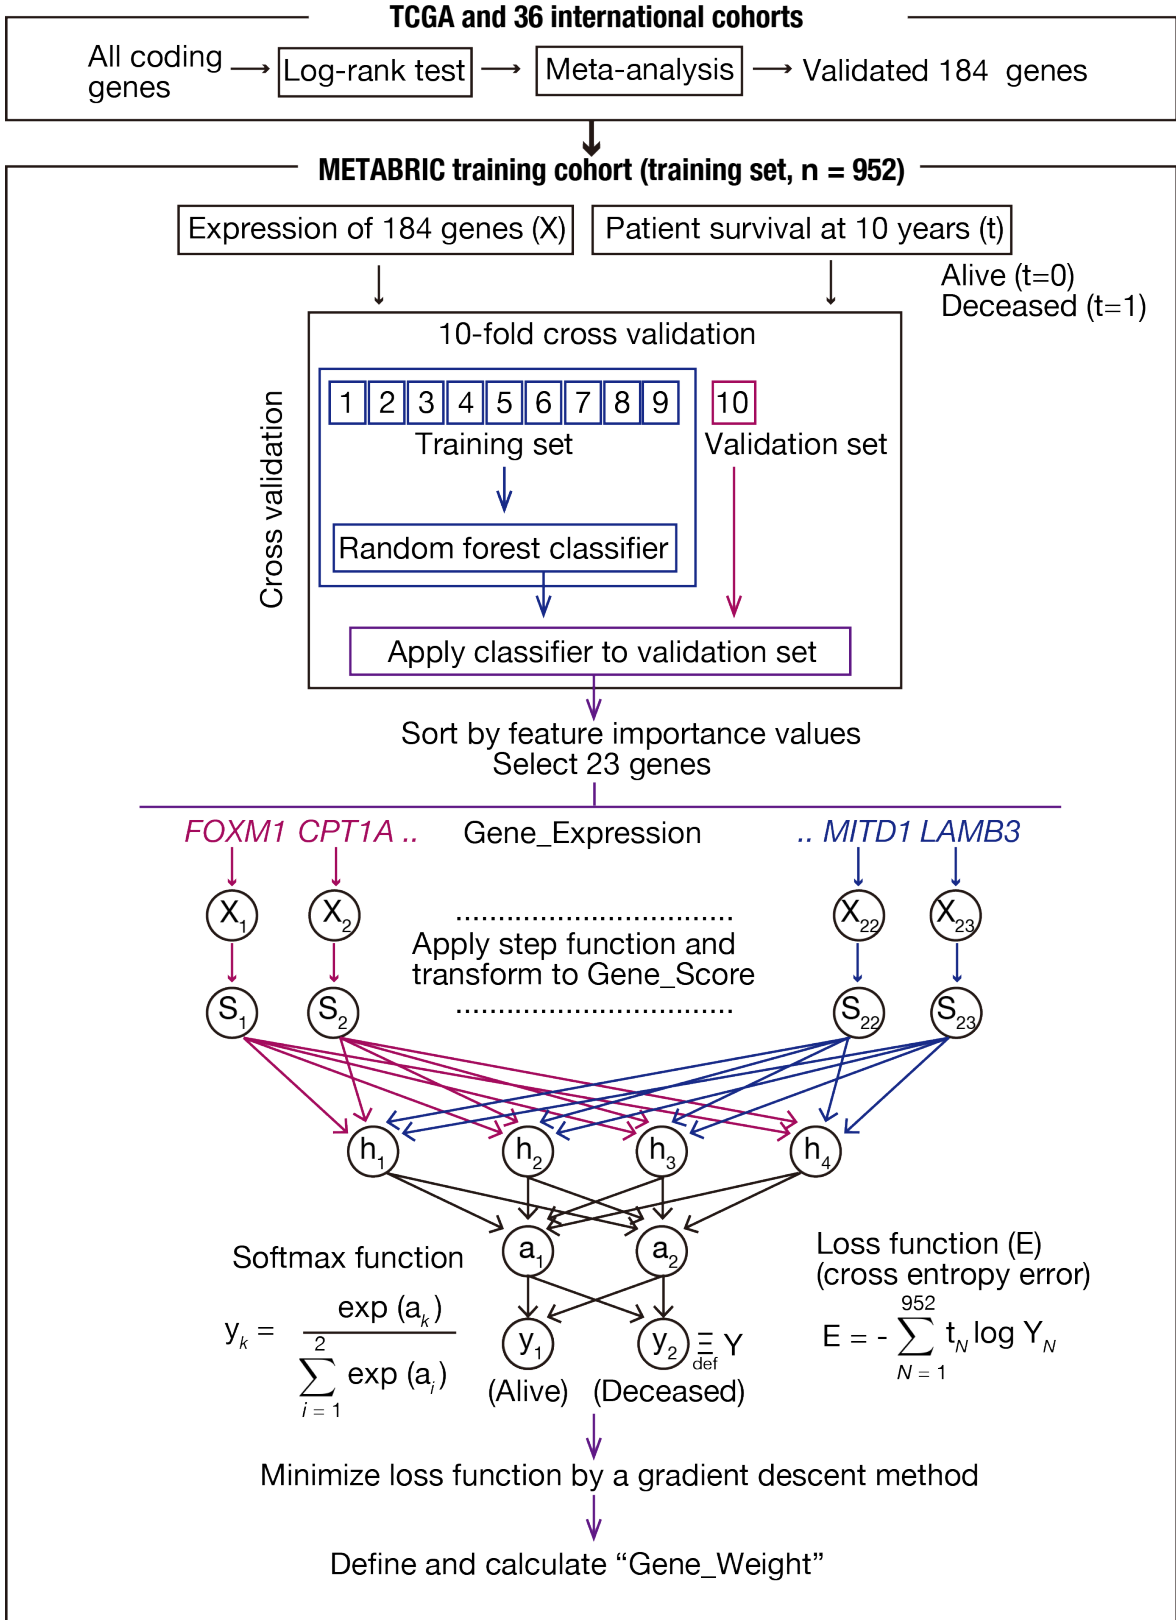

35 **Fig. S1.** Workflow for computational calculations. Expression status ( $X$ ) of the 184  
36 validated prognosis-related genes in the METABRIC training set ( $n = 952$ ) was first  
37 entered into a machine learning AI algorithm known as a random forest classifier.  
38 Twenty-three genes were selected on the basis of feature importance values. On  
39 the basis of the binary expression status of these 23 genes ( $S$ , designated  
40 Gene\_Score), the probability for patient survival status at 10 years ( $y_1$ , alive;  $y_2$ ,  
41 deceased) was predicted with the use of a softmax function. By comparison with  
42 the actual status ( $t$ ), cross entropy error was calculated as a loss function. Each  
43 weight was optimized with the Adam method (learning rate, 0.001; epochs, 1000).  
44

Shimizu et al. Figure S2

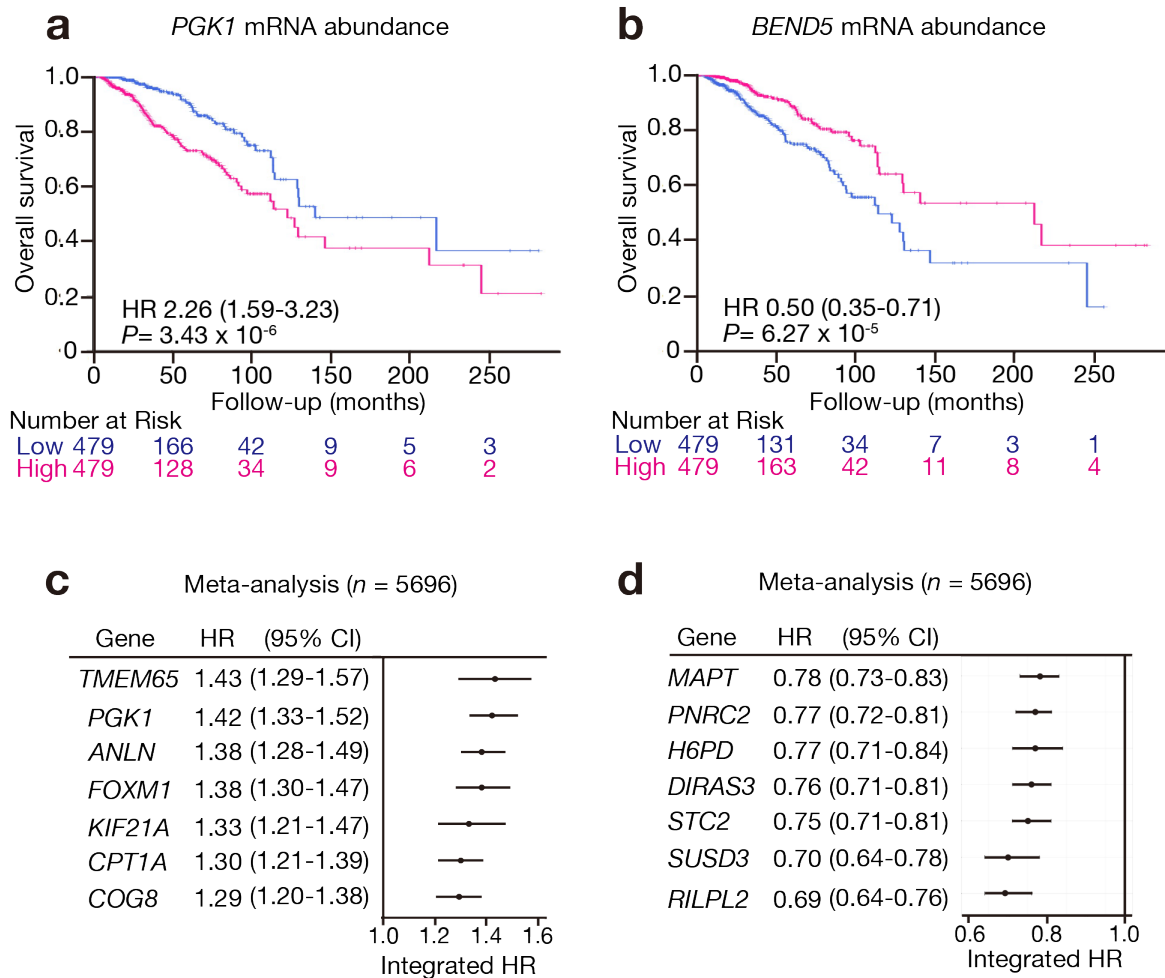

45

46 **Fig. S2.** Comprehensive validation of all prognosis-related genes by meta-analysis.

47 (a and b) Kaplan-Meier curves for OS according to the expression level of *PGK1*

48 (a) or *BEND5* (b) in the TCGA cohort. The HR, its 95% CI, the log-rank *P* value,

49 and the number at risk are shown. (c and d) Top seven genes among the 184

50 validated prognosis-related genes for which high (c) or low (d) expression levels

51 are associated with poor survival.

52

Shimizu et al. Figure S3

| TCGA-A1-A0SF |                 |            |             |                | TCGA-BH-A203    |              |                |       |
|--------------|-----------------|------------|-------------|----------------|-----------------|--------------|----------------|-------|
|              | Gene_Expression | Gene_Score | Gene_Weight | Score x Weight | Gene_Expression | Gene_Score   | Score x Weight |       |
| FOXM1        | Below median    | 0          | 3.424       | 0              | FOXM1           | Above median | 1              | 3.424 |
| CPT1A        | Below median    | 0          | 3.399       | 0              | CPT1A           | Above median | 1              | 3.399 |
| GARS         | Above median    | 1          | 2.539       | 2.539          | GARS            | Above median | 1              | 2.539 |
| MARS         | Below median    | 0          | 2.312       | 0              | MARS            | Above median | 1              | 2.312 |
| UTP23        | Below median    | 0          | 2.311       | 0              | UTP23           | Above median | 1              | 2.311 |
| ANLN         | Below median    | 0          | 2.225       | 0              | ANLN            | Above median | 1              | 2.225 |
| HMGB3        | Above median    | 1          | 2.202       | 2.202          | HMGB3           | Above median | 1              | 2.202 |
| ATP5F1B      | Above median    | 1          | 1.934       | 1.934          | ATP5F1B         | Above median | 1              | 1.934 |
| APOOL        | Below median    | 0          | 1.754       | 0              | APOOL           | Above median | 1              | 1.754 |
| CYB561       | Below median    | 0          | 1.594       | 0              | CYB561          | Above median | 1              | 1.594 |
| GRHL2        | Below median    | 0          | 1.526       | 0              | GRHL2           | Above median | 1              | 1.526 |
| ESRP1        | Below median    | 0          | 1.485       | 0              | ESRP1           | Above median | 1              | 1.485 |
| EZR          | Above median    | 1          | 1.372       | 1.372          | EZR             | Above median | 1              | 1.372 |
| RBBP8        | Below median    | 1          | 3.095       | 3.095          | RBBP8           | Below median | 1              | 3.095 |
| CIRBP        | Above median    | 0          | 3.083       | 0              | CIRBP           | Below median | 1              | 3.083 |
| PTGER3       | Below median    | 1          | 2.802       | 2.802          | PTGER3          | Below median | 1              | 2.802 |
| LAMA3        | Above median    | 0          | 2.601       | 0              | LAMA3           | Below median | 1              | 2.601 |
| OARD1        | Below median    | 1          | 2.008       | 2.008          | OARD1           | Below median | 1              | 2.008 |
| ANKRD29      | Above median    | 0          | 1.886       | 0              | ANKRD29         | Below median | 1              | 1.886 |
| EGR3         | Above median    | 0          | 1.836       | 0              | EGR3            | Below median | 1              | 1.836 |
| DIRAS3       | Above median    | 0          | 1.821       | 0              | DIRAS3          | Below median | 1              | 1.821 |
| MITD1        | Above median    | 0          | 1.425       | 0              | MITD1           | Above median | 0              | 0     |
| LAMB3        | Above median    | 0          | 1.366       | 0              | LAMB3           | Below median | 1              | 1.366 |

mPS 15.952

mPS 48.575

53

54 **Fig. S3.** Representative calculation of mPS. Actual calculation of mPS is shown for  
 55 two patients (**a** and **b**) enrolled in the TCGA breast cancer cohort.

56

Shimizu et al. Figure S4

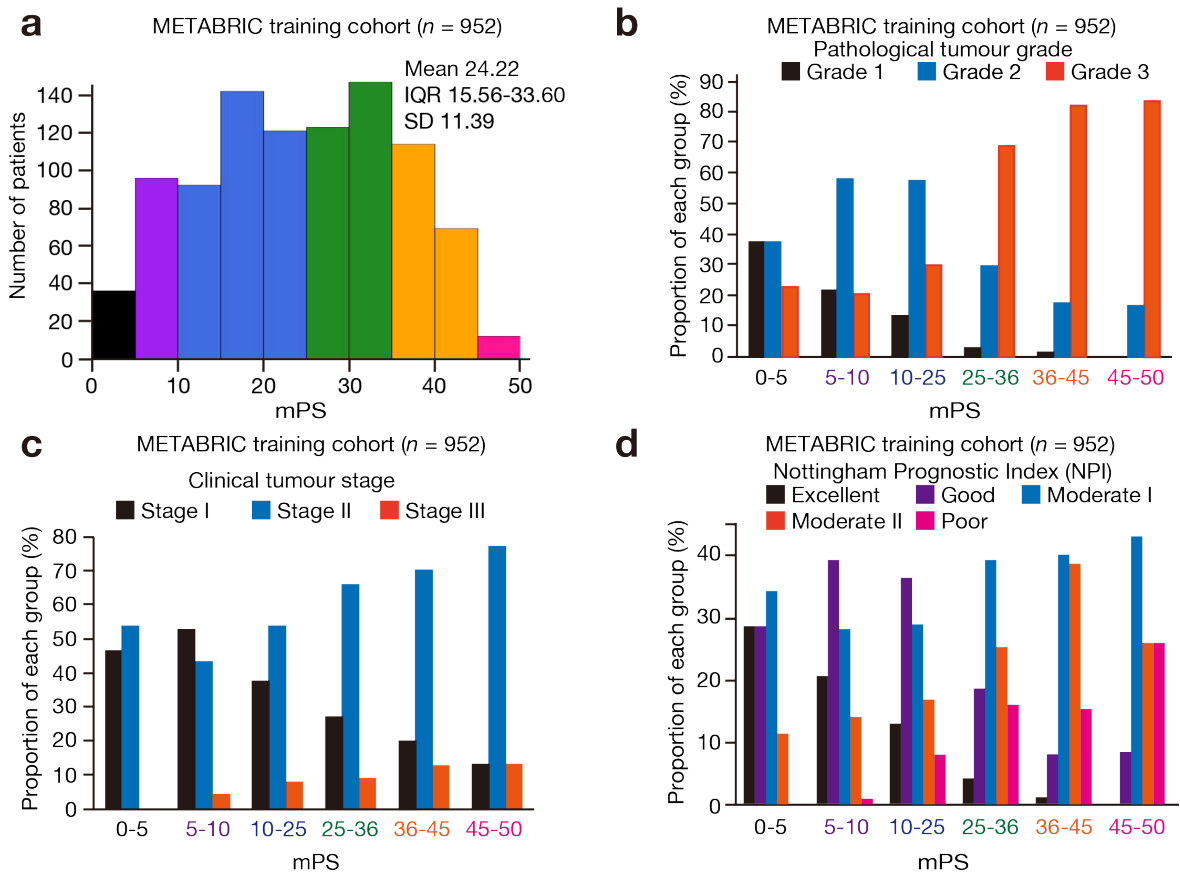

57

58 **Fig. S4.** Characteristics of mPS bins. (a) Distribution of mPS (ranging from 0 to 50)  
59 for all patients in the METABRIC training cohort. (b–d) Percentage of patients  
60 classified according to pathological grade (b), clinical tumour stage (c), or NPI  
61 cluster (d) in each of six mPS bins for the METABRIC training cohort. See also  
62 Supplementary Table S4.

63

Shimizu et al. Figure S5

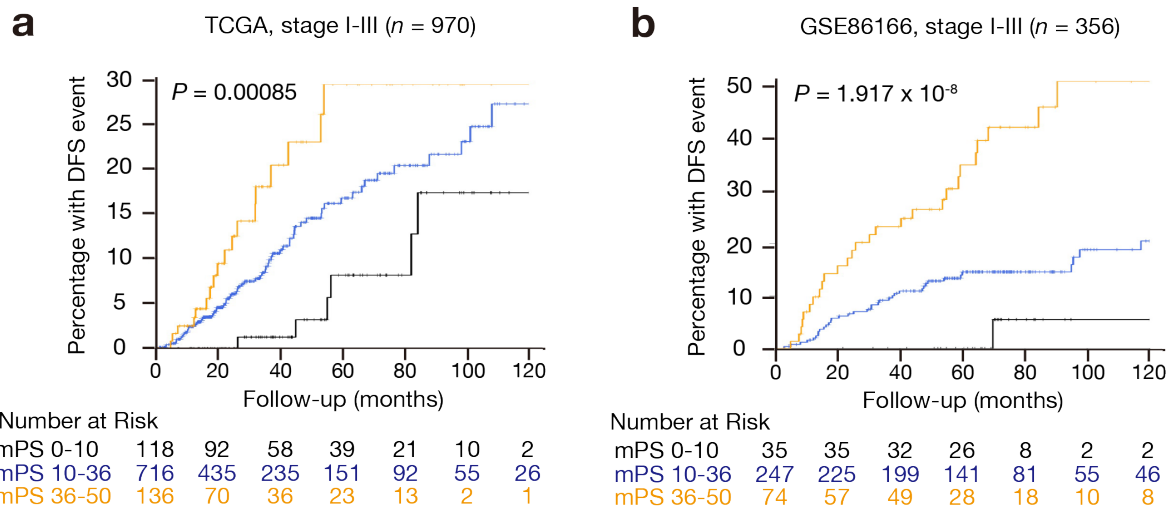

64

65

66

67

68

69

**Fig. S5.** Stratification of DFS by mPS. **(a)** Kaplan-Meier curves according to mPS for DFS events in patients at stage I, II, or III in the TCGA cohort. **(b)** Kaplan-Meier curves according to mPS for DFS events in patients at stage I, II, or III in the GSE86166 data set. Only patients with DFS data are shown.

Shimizu et al. Figure S6

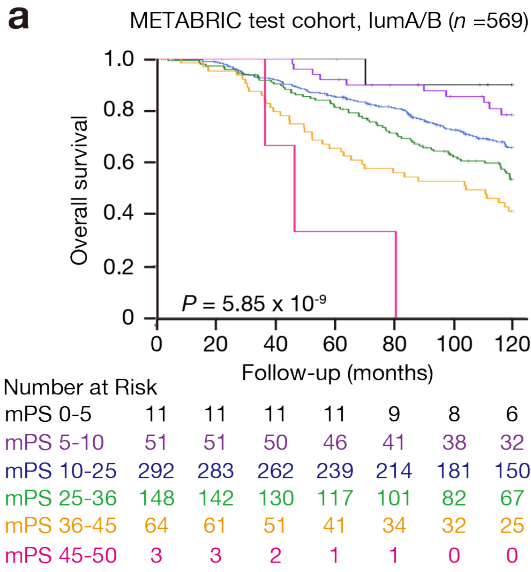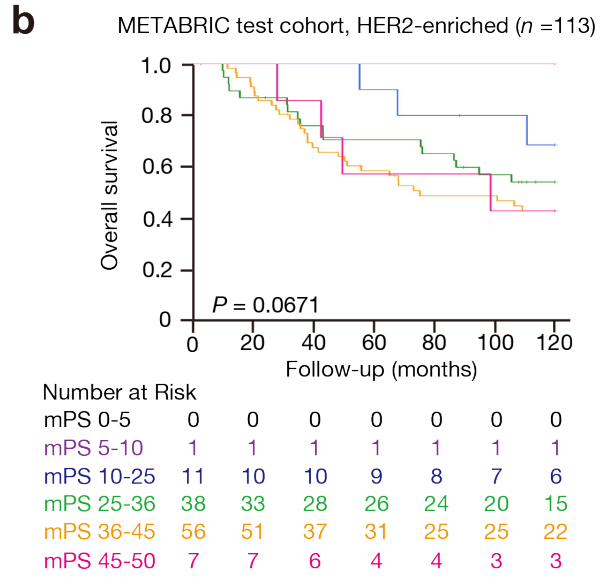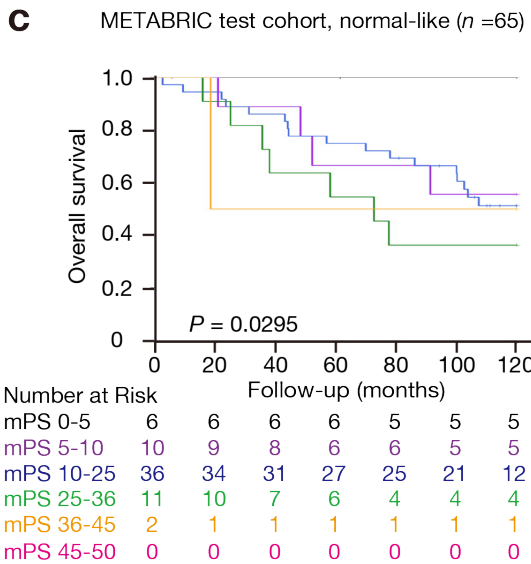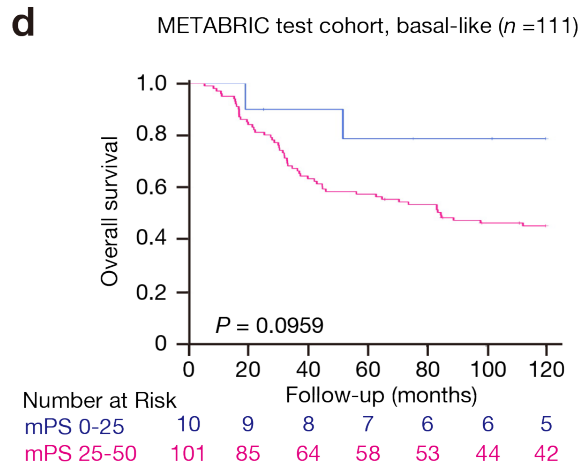

70

71 **Fig. S6.** Stratification of patients according to mPS for intrinsic subtypes of breast  
 72 cancer. Kaplan-Meier curves according to mPS were constructed for OS of patients  
 73 in the METABRIC test cohort with luminal A or B (lumA/B) (a), HER2-enriched (b),  
 74 normal-like (c), or basal-like (d) intrinsic subtypes.

75



**Shimizu et al. Figure S7**

METABRIC test cohort , 50s & 60s (n =495)

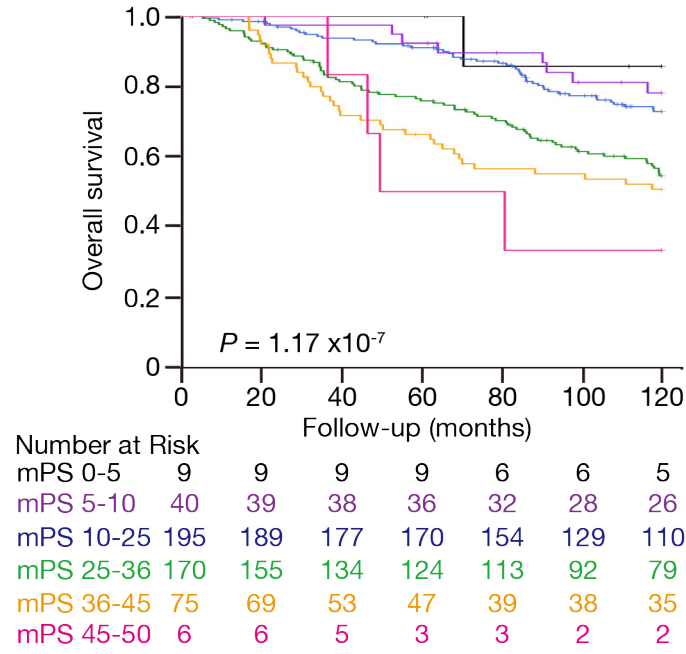

76

77 **Fig. S7.** Kaplan-Meier curves according to mPS for OS of patients in the  
 78 METABRIC test cohort in their 50s or 60s.

79

Shimizu et al. Figure S8

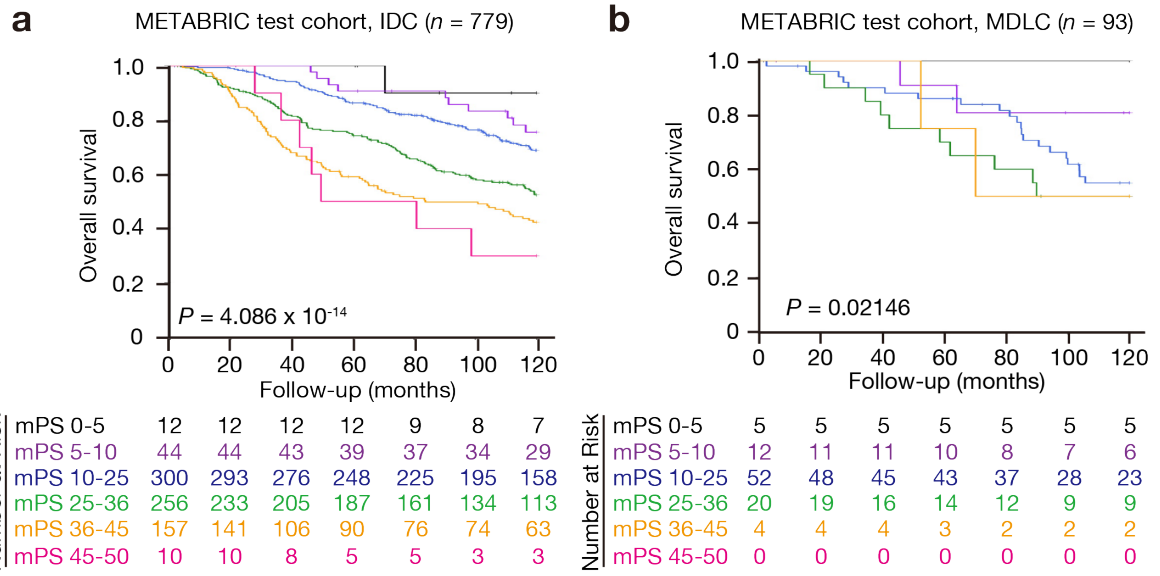

80

81 **Fig. S8.** Kaplan-Meier curves according to mPS for OS of patients in the

82 METABRIC test cohort with IDC (a) or MDLC (b).

83

Shimizu et al. Figure S9

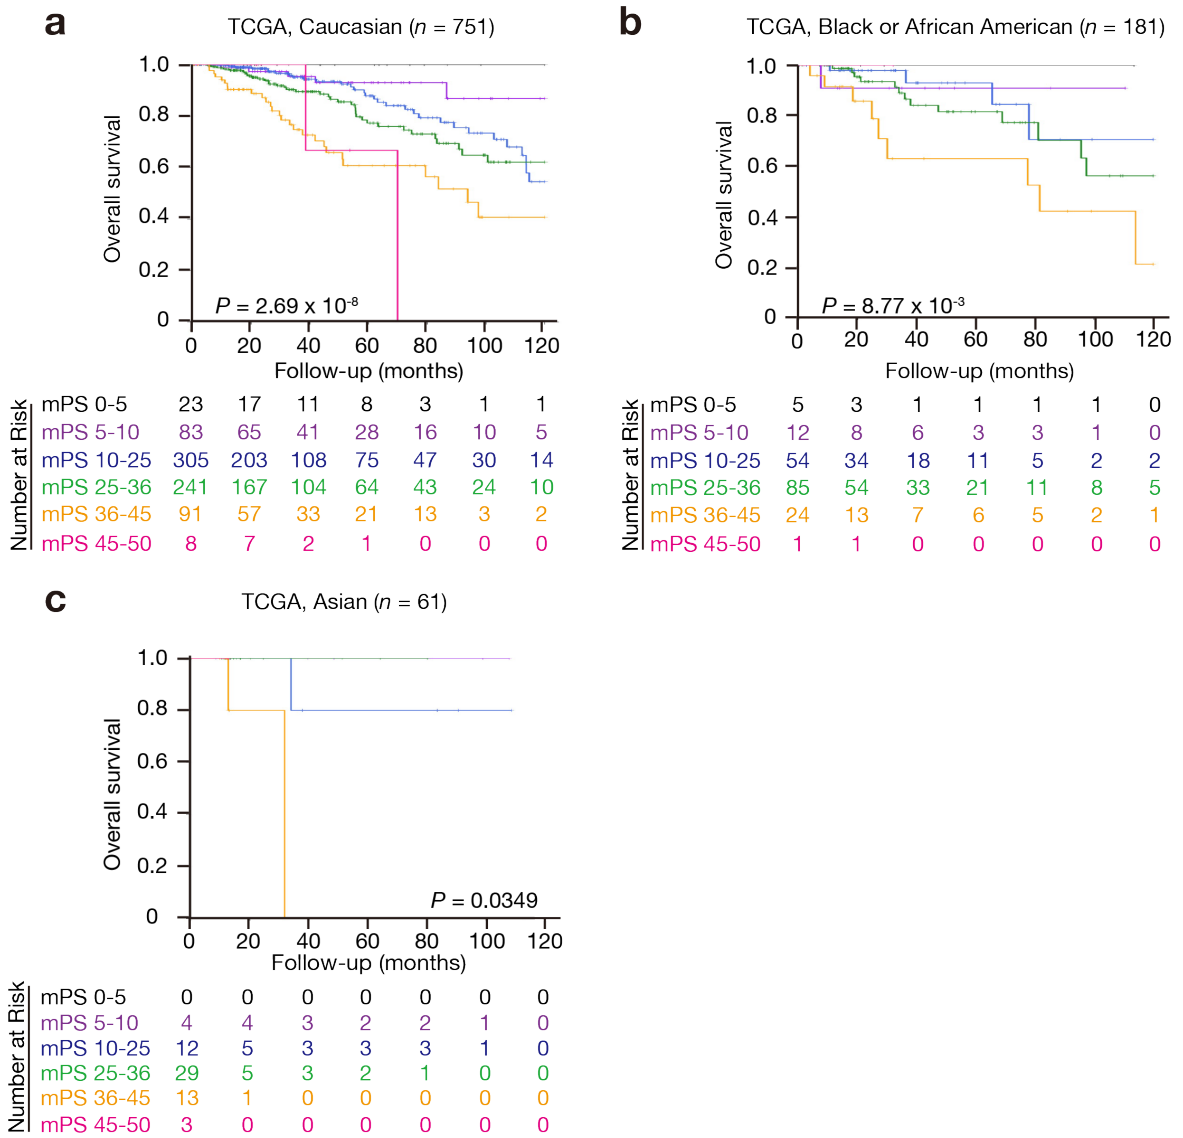

84

85 **Fig. S9.** Stratification of breast cancer patients of different races according to mPS.  
 86 Kaplan-Meier curves according to mPS were constructed for OS of Caucasian (a),  
 87 black or African-American (b), and Asian (c) patients in the TCGA breast cancer  
 88 cohort.

89

Shimizu et al. Figure S10

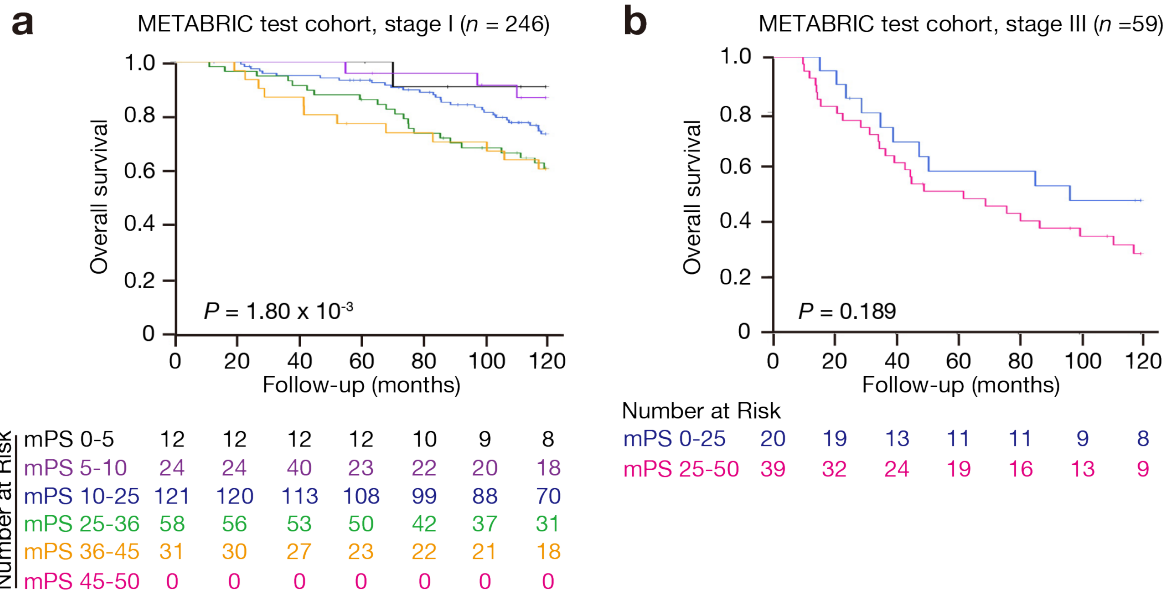

90

91 **Fig. S10.** Kaplan-Meier curves according to mPS for OS of patients in the  
 92 METABRIC test cohort at clinical TNM stage I (**a**) or III (**b**).  
 93

Shimizu et al. Figure S11

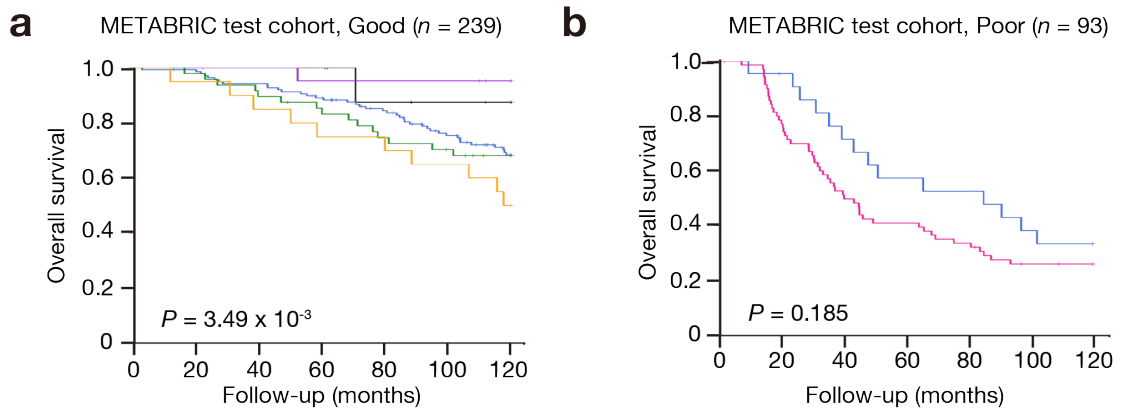

| Number at Risk | METABRIC test cohort, Good (n = 239) |      |       |       |       |       |      |       | METABRIC test cohort, Poor (n = 93) |       |      |       |      |       |  |  |
|----------------|--------------------------------------|------|-------|-------|-------|-------|------|-------|-------------------------------------|-------|------|-------|------|-------|--|--|
|                | mPS 0-5                              | 5-10 | 10-25 | 25-36 | 36-45 | 45-50 | 0-25 | 25-50 | mPS 0-25                            | 25-50 | 0-25 | 25-50 | 0-25 | 25-50 |  |  |
| mPS 0-5        | 10                                   | 10   | 10    | 10    | 7     | 6     | 5    |       |                                     |       |      |       |      |       |  |  |
| mPS 5-10       | 22                                   | 22   | 21    | 20    | 20    | 20    | 18   | 23    | 20                                  | 15    | 12   | 11    | 8    | 7     |  |  |
| mPS 10-25      | 139                                  | 136  | 129   | 119   | 107   | 91    | 73   | 70    | 54                                  | 34    | 28   | 23    | 16   | 15    |  |  |
| mPS 25-36      | 48                                   | 47   | 43    | 39    | 35    | 32    | 28   |       |                                     |       |      |       |      |       |  |  |
| mPS 36-45      | 20                                   | 19   | 17    | 15    | 14    | 13    | 10   |       |                                     |       |      |       |      |       |  |  |
| mPS 45-50      | 0                                    | 0    | 0     | 0     | 0     | 0     | 0    |       |                                     |       |      |       |      |       |  |  |

94

95 **Fig. S11.** Stratification of patients according to mPS regardless of NPI.  
 96 Kaplan-Meier curves were constructed according to mPS for OS of patients in the  
 97 METABRIC test cohort assigned to the NPI clusters of Good (a) or Poor (b). Even  
 98 in the Poor (NPI > 5.40) group, mPS-high patients tend to show a worse prognosis  
 99 than mPS-low patients.

100

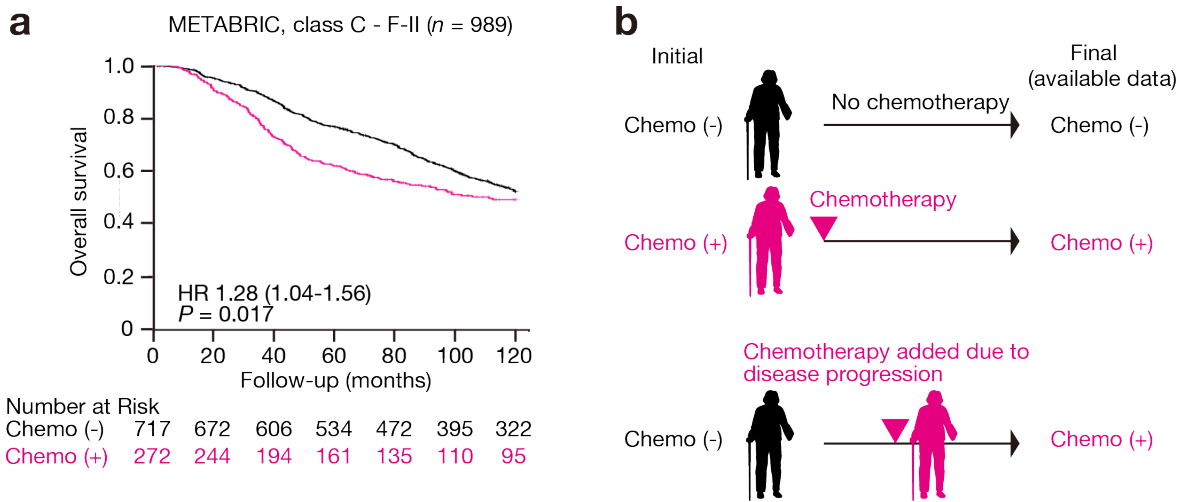

101

102 **Fig. S12.** Relation of chemotherapy to OS in the METABRIC cohort. **(a)**

103 Kaplan-Meier curves for patients in class C, D, E, F-I, or F-II according to whether

104 they received cytotoxic chemotherapy or not during the follow-up time. **(b)** Limited

105 availability of clinical data. Evaluation of potential utility as a predictive score

106 requires information regarding whether the patient received chemotherapy at initial

107 diagnosis. The available data, however, reflect the final status of chemotherapy

108 (performed or not), which means that even if chemotherapy was performed

109 because of disease progression or relapse, the final chemotherapy status is

110 recorded as “Yes” in this data set.
